# Supplementary material for: Low-temperature biosynthesis of silver nanoparticles using mango leaf extract: catalytic effect, antioxidant properties, anticancer activity and application for colorimetric sensing
Source: Royal Society of Chemistry journal article supplement (doi:10.1039/c8nj03156h), 2018-01-01
Supplement: c8nj03156h1.pdf [file c8nj03156h1.pdf]

## Supporting Information

### **Low-temperature biosynthesis of silver nanoparticles using mango leaf extract: Catalytic effect, antioxidant properties, anticancer activity and application for colorimetric sensing**

Fayezeh Samari<sup>a,\*</sup>, Hossein Salehipoor<sup>a</sup>, Ebrahim Eftekhari<sup>b</sup>, Saeed Yousefinejad<sup>c \*</sup>

<sup>a</sup> *Department of Chemistry, Faculty of Sciences, University of Hormozgan, 71961 Bandar Abbas, Iran*

<sup>b</sup> *Molecular Medicine Research Center, Hormozgan Health Institute, Hormozgan University of Medical Sciences, Bandar Abbas, Iran*

<sup>c</sup> *Research Center for Health Sciences, Institute of Health, Department of Occupational Health Engineering, School of Health, Shiraz University of Medical Sciences, Shiraz, Iran*

\*Corresponding Author, Tel.: +98-76-3337 7063, Fax: +98-76-3367 0714,

E-mail address: [fsamari@hormozgan.ac.ir](mailto:fsamari@hormozgan.ac.ir) (F. Samari)

E-mail address: [yousefisa@sums.ac.ir](mailto:yousefisa@sums.ac.ir) (S. Yousefinejad)

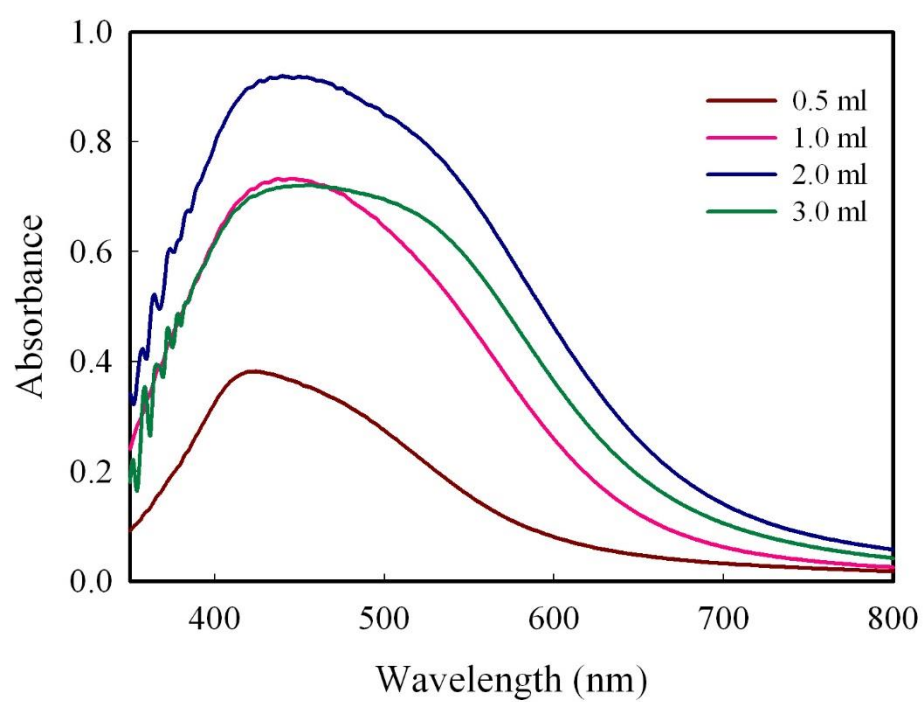

**Figure S1.** UV–Vis spectra of the silver nanoparticles synthesized at different mango leaf extract content from 0.5 to 3 mL.

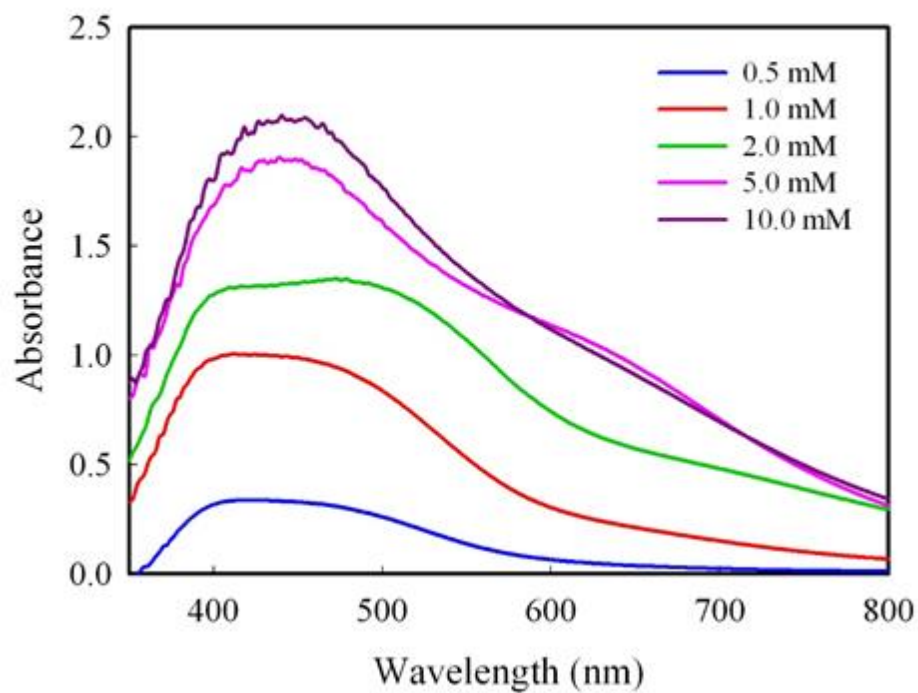

**Figure S2.** UV–Vis spectra of the silver nanoparticles synthesized at different silver nitrate concentration from 0.5 to 10.0 mM.

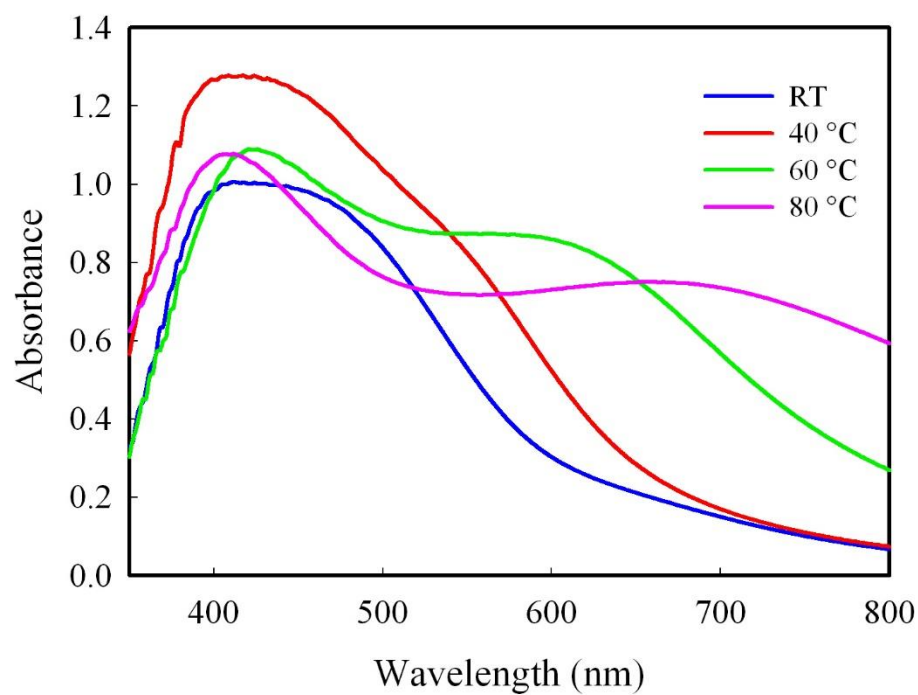

**Figure S3.** UV–vis spectra of the silver nanoparticles synthesized at different reaction temperature (°C).

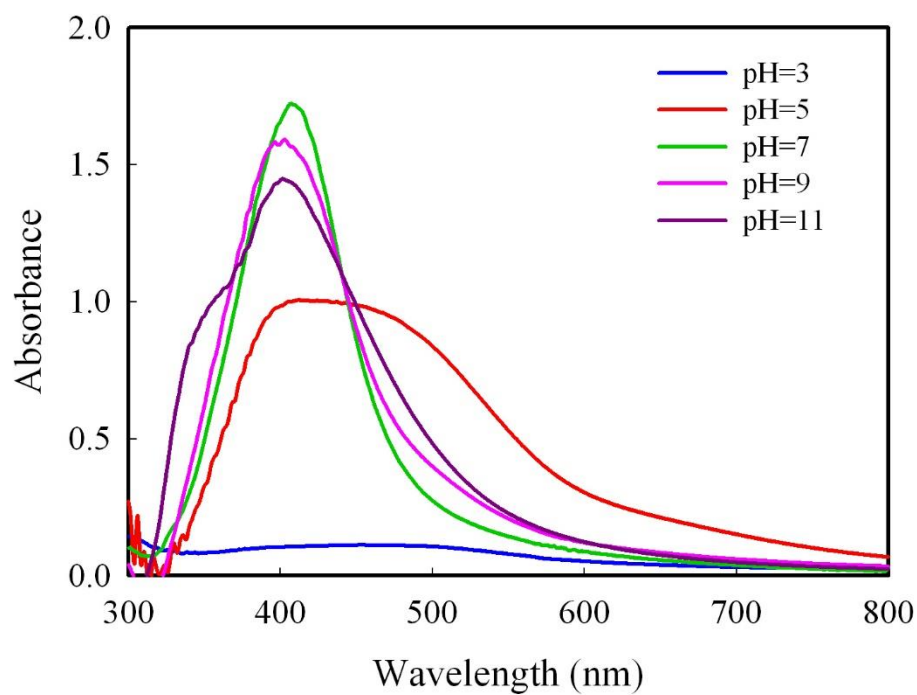

**Figure S4.** pH dependence UV-Vis. absorption spectra of AgNPs.

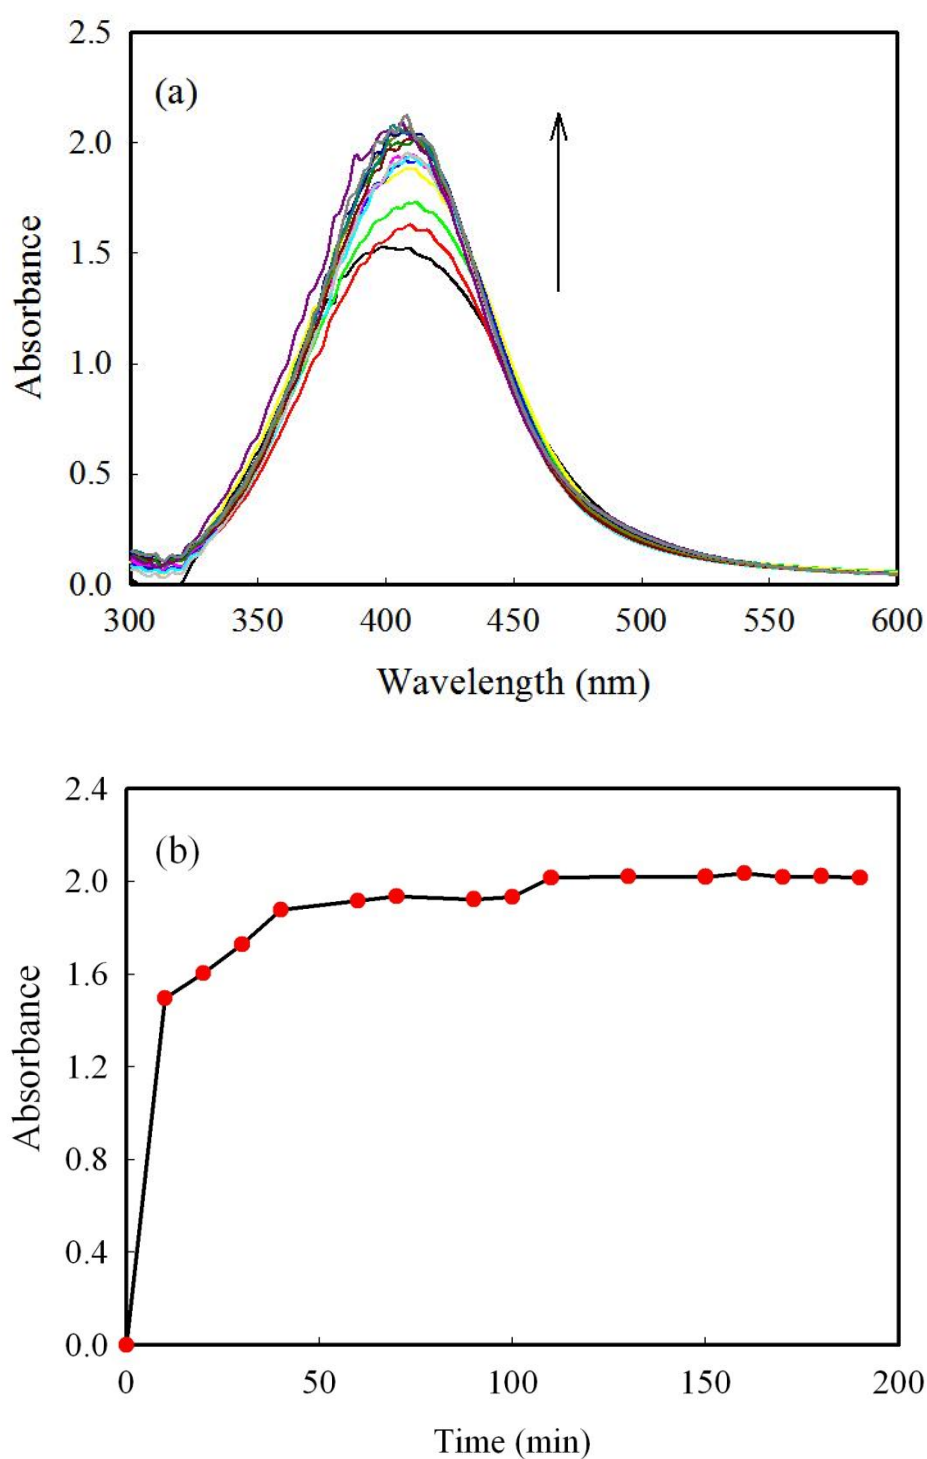

**Figure S5.** UV-Vis spectra of the AgNPs synthesized at different reaction time **(a)**. Optimization the reaction time for synthesis of AgNPs **(b)**.

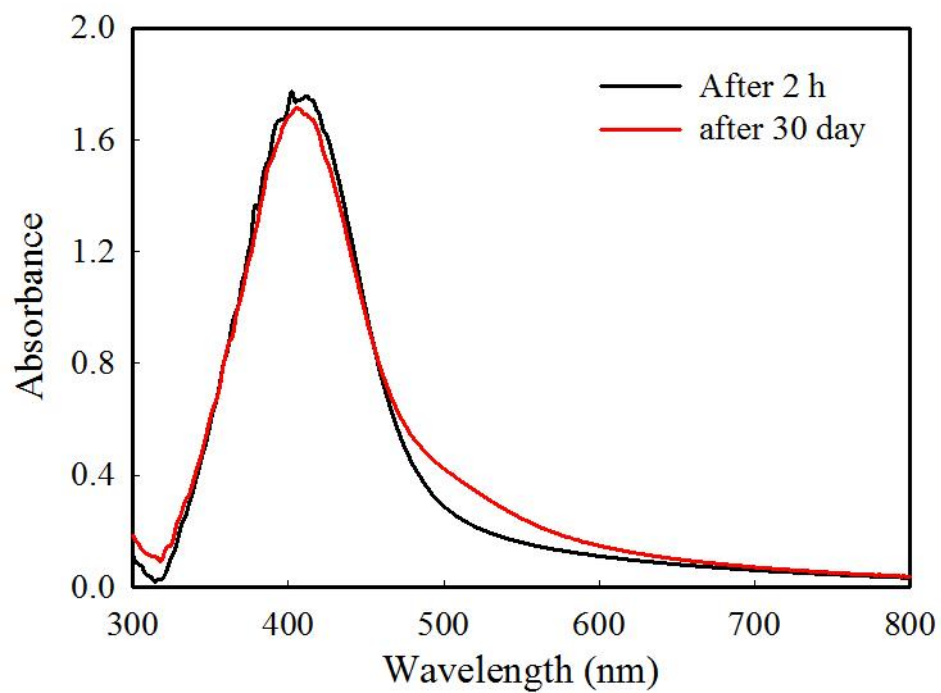

**Figure S6.** Spectral changes of synthesized AgNPs after one month.

**Table S1.** Comparison of the biological properties of some previously reported Ag NPs with our work

| Utilized Agent ( <u>Method</u> )                                                      | Catalytic effect | Antioxidant properties                                                                                                                                                          | Anticancer activities                                  | Application as colorimetric sensing                                 | Ref. ‡ |
|---------------------------------------------------------------------------------------|------------------|---------------------------------------------------------------------------------------------------------------------------------------------------------------------------------|--------------------------------------------------------|---------------------------------------------------------------------|--------|
| NaBH <sub>4</sub> and amine-terminated G5 dendrimers ( <u>Chemical</u> )              | Not reported     | Not reported                                                                                                                                                                    | Not reported                                           | Sensing Hg <sup>2+</sup> after using specific stabilizer for Ag NPs | [74]   |
| Citrate and Oligonucleotides                                                          | Not reported     | Not reported                                                                                                                                                                    | Not reported                                           | Sensing Hg <sup>2+</sup> after using specific stabilizer for Ag NPs | [75]   |
| Sodium borohydride and adenine nucleotide ( <u>Chemical</u> )                         | Not reported     | Not reported                                                                                                                                                                    | Not reported                                           | Sensing Hg <sup>2+</sup> after using specific stabilizer for Ag NPs | [76]   |
| NaBH <sub>4</sub> and a Dye-Labeled DNA Scaffold ( <u>Chemical</u> )                  | Not reported     | Not reported                                                                                                                                                                    | Not reported                                           | Sensing Hg <sup>2+</sup> after using specific stabilizer for Ag NPs | [77]   |
| Sodium borohydride, trisodium citrate, ascorbic acid and chitosan ( <u>Chemical</u> ) | Not reported     | Not reported                                                                                                                                                                    | Against human non-small lung cancer cells (NCI-H460)   | Not reported                                                        | [86]   |
| Silver nanoparticle powder coated with 0.2% polyvinyl pyrrolidone ( <u>Chemical</u> ) | Not reported     | Effective on reactive oxygen species (ROS)                                                                                                                                      | Against A549 human lung carcinoma epithelial-like cell | Not reported                                                        | [88]   |
| <i>Piper longum</i> fruit ( <u>Green biosynthesis</u> )                               | Not reported     | Quantitative determination of total phenol content; diphenyl-picryl-hydrazyl (DPPH) free radical scavenging assay; Superoxide radical scavenging activity; Nitric oxide radical | cancer cell line MCF-7                                 | Not reported                                                        | [89]   |



|                                                                        |                                                        |                                                                                                                                                                                                                           |                                                |                                                         |           |
|------------------------------------------------------------------------|--------------------------------------------------------|---------------------------------------------------------------------------------------------------------------------------------------------------------------------------------------------------------------------------|------------------------------------------------|---------------------------------------------------------|-----------|
|                                                                        |                                                        | scavenging; Hydrogen peroxide scavenging assay                                                                                                                                                                            |                                                |                                                         |           |
| Iresine herbstii leaf ( <u>Green biosynthesis</u> )                    | Not reported                                           | Determination of total phenolic content (TPC); DPPH free radical scavenging; Reducing power; Total antioxidant capacity;                                                                                                  | HeLa cervical cancer cell                      | Not reported                                            | [90]      |
| Leaf extract of <i>Morinda pubescens</i> ( <u>Green biosynthesis</u> ) | Not reported                                           | DPPH free radical scavenging; Ferric thiocyanate (FTC); Thiobarbituric acid (TBA) method; Superoxide Anion Radical scavenging assay; Hydroxyl radical scavenging assay; Metal chelating assay and Phosphomolybdenum assay | Human Epithelium cells of liver cancer         |                                                         | [91]      |
| Terminalia chebula fruit extract ( <u>Green biosynthesis</u> )         | Reduction of methylene blue                            | Not reported                                                                                                                                                                                                              | Not reported                                   | Not reported                                            | [92]      |
| Trigonella foenum-graecum seeds ( <u>Green biosynthesis</u> )          | Reduction of methyl orange, methylene blue and eosin Y | Not reported                                                                                                                                                                                                              | Not reported                                   | Not reported                                            | [93]      |
| Mango leaf extract ( <u>Green biosynthesis</u> )                       | Reduction of methylene blue and rhodamine B            | ferric reducing antioxidant power (FRAP)                                                                                                                                                                                  | human colon cancer cell lines HCT116 and SW480 | Sensing Hg <sup>2+</sup> without modification of Ag NPs | This work |

‡ List of references can be found in the original article
